# Supplementary material for: Effects of Sm on Fe–Mn catalysts for Fischer–Tropsch synthesis
Source: Royal Society of Chemistry journal article supplement (doi:10.1039/c9ra05337a), 2019-01-01
Supplement: c9ra05337a1.pdf [file c9ra05337a1.pdf]

## Electronic Supplementary Information

Table S1 The CO-TPD results of fresh catalysts

| Catalyst | Peak I           |                            | Peak II          |                            |
|----------|------------------|----------------------------|------------------|----------------------------|
|          | Temperature (°C) | Desorption amount (μmol/g) | Temperature (°C) | Desorption amount (μmol/g) |
| Sm0      | 85.1             | 29.11                      | 563.0            | 80.19                      |
| Sm0.5    | 83.8             | 26.37                      | 591.2            | 93.18                      |
| Sm1      | 85.3             | 22.48                      | 617.7            | 165.62                     |
| Sm1.5    | 86.3             | 28.62                      | 587.6            | 102.34                     |
| Sm2      | 85.0             | 29.45                      | 580.3            | 98.69                      |

Table S2 The H<sub>2</sub>-TPD results of fresh catalysts

| Catalyst | Peak I           |                            | Peak II          |                            |
|----------|------------------|----------------------------|------------------|----------------------------|
|          | Temperature (°C) | Desorption amount (μmol/g) | Temperature (°C) | Desorption amount (μmol/g) |
| Sm0      | 85.7             | 13.36                      | 257.1            | 55.50                      |
| Sm0.5    | 88.2             | 14.28                      | 251.6            | 48.57                      |
| Sm1      | 88.1             | 12.45                      | 240.3            | 30.84                      |
| Sm1.5    | 84.2             | 15.87                      | 255.4            | 51.21                      |
| Sm2      | 86.3             | 17.99                      | 255.8            | 73.94                      |

Table S3 The CO<sub>2</sub>-TPD results of fresh catalysts

| Catalyst | Peak I           |                            | Peak II          |                            |
|----------|------------------|----------------------------|------------------|----------------------------|
|          | Temperature (°C) | Desorption amount (μmol/g) | Temperature (°C) | Desorption amount (μmol/g) |
| Sm0      | 104.0            | 1034.03                    | 489.9            | 3583.91                    |
| Sm0.5    | 117.1            | 1889.97                    | 501.7            | 3725.74                    |
| Sm1      | 117.5            | 1807.78                    | 527.6            | 4959.07                    |
| Sm1.5    | 105.6            | 1123.11                    | 519.1            | 4324.98                    |
| Sm2      | 117.7            | 2019.09                    | 491.2            | 3487.17                    |

Table S4 The Fe/Mn/Sm surface ratios of catalysts after reduction in XPS.

|       | Fe (%) | Mn (%) | Sm(%) |
|-------|--------|--------|-------|
| Sm0   | 30.11  | 1.86   | 0.00  |
| Sm0.5 | 28.33  | 1.89   | 0.95  |
| Sm1   | 27.63  | 1.84   | 1.51  |
| Sm1.5 | 27.41  | 2.27   | 1.75  |
| Sm2   | 27.42  | 2.35   | 2.07  |
